# Supplementary material for: Simulating sustained yield harvesting adaptive to future climate change
Source: Copernicus journal article supplement (doi:10.5194/bg-2017-531), 2018-01-17
Supplement: Supplementary file 1 [file bg-2017-531-supplement.zip]

Archive with 2 entries (2 files):
- S1.pdf
- S2.xlsx
