# Supplementary material for: Simulating sustained yield harvesting adaptive to future climate change
Source: Copernicus journal article supplement (doi:10.5194/bg-2017-531), 2018-01-17
Supplement: Supplementary file 1 [file bg-2017-531-supplement.zip › S1.pdf]

## S1: Supplementary material 1

### A1. JSBACH simulations

Simulations were conducted with revision 7277 of *cosmos-landveg-fom*, a svn branch of revision 7215 of *cosmos-landveg*, the JSBACH development branch of the department "The Land in the Earth System" of the Max Planck Institute for Meteorology.

Simulations were executed on the IBM Power 6 machine BLIZZARD at the German Climate Computing Center (DKRZ).

Sustained-yield (SY) forest harvesting is implemented in this model version as described in the methods section of the main text. A modification over earlier JSBACH versions is that wood harvest applies just to harvesting from all woody PFTs and specifically from the above-ground wood carbon pool. To isolate the effects of different wood harvest rules, we do not apply land-use change and dynamic biogeographic vegetation shifts for our future scenarios. We take into account changes in wood carbon pool, natural mortality and forest disturbances to determine the net annual increment of the above-ground wood carbon pool as the maximum amount to be harvested from forest areas.

#### A1.1 Initial state in 2006

All simulations described in the paper started in 2006 from the same initial conditions. These conditions base on a spin-up of the terrestrial system state using the MPI-ESM climate from the historical (1850-2005) CMIP5 experiment (Giorgetta et al., 2013) and land-use change and wood harvest data from Hurtt et al. (2011).

The initial state was derived carrying out three consecutive simulations. (I) An initial simulation with JSBACH to spin-up photosynthesis, phenology, hydrology and running climatic means required by the disturbance module of JSBACH. This simulation was forced by cycling the first

30 years (1850-1879) of the historical CMIP5 experiment for four times. Wood harvest was fixed to the level of the initial year 1850 and no land-use change was applied. (II) A simulation with the stand-alone carbon cycle module of JSBACH to equilibrate the carbon pools with respect to the driving climate. This simulation was forced by NPP, LAI and climatic means, resulting from the preceding JSBACH simulation. (III) A second JSBACH simulation resuming the first JSBACH simulation, but starting from the equilibrated carbon pools. In this second simulation the full transient (1850-2005) climate from the historical CMIP5 experiment was used and land-use change and wood harvest were prescribed according to the data from Hurtt et al. (2011).

#### A1.2 Reference level for SY

An important decision for our study is the definition of the reference level of the wood carbon pool to be kept constant in the future applying SY. As one of the main goals of our study is to estimate potentials for wood harvesting under future climate scenarios, consistent with the historic past, we refer to the current level of wood carbon pools. The reference level for the SY simulations was therefore derived from the maximum simulated wood carbon per grid-cell and PFT in the period from 1996 to 2005 under the historical JSBACH simulation (see A1.1 simulation III). Because the historical JSBACH simulation was subject to land-use and land-cover changes maximum wood carbon densities were used instead of wood carbon stocks.

#### References

Giorgetta MA et al. (2013) Climate and carbon cycle changes from 1850 to 2100 in MPI-ESM simulations for the Coupled Model Intercomparison Project phase 5. *J. Adv. Model. Earth Syst.* 5:572–597.

Hurt, GC et al (2011) Harmonization of land-use scenarios for the period 1500–2100. 600 years of global gridded annual land-use transitions, wood harvest, and resulting secondary lands. *Climatic Change* 109:117–161.
