# Supplementary material for: Simulating sustained yield harvesting adaptive to future climate change
Source: Copernicus journal article supplement (doi:10.5194/bg-2017-531), 2018-01-17
Supplement: Supplementary file 1 [file bg-2017-531-supplement.zip › S2.xlsx]

## Sheet: Information sheet
S2: Supplementary material 2
*This file includes 6 tables representing steps for calculating emissions from and net mitigation effect of wood harvest
**This is an example applied to the country Ethiopia (the same procedur eis repeated for other countries)
*** The full dataset for global calculations are saved and can be achieved upon request and approval (Email Corresponding Authors)
Table1:	Country specific (for Ethiopia) harvested wood production statistics from FAO statistical database at 2005
Table2:	Allocation of harvested wood biomass from JSBACH to 14 FAO wood products catagories according to their percentages as in Table1
Table3:	Re-allocating 14 wood products catagories (FAO stat catagories) to 3 anthropogenic wood pools ith 3 differenet life times (1, 10, and 100 years)
Table4:	Calculating emissions from 10 years life time wood product pool for 2005-2100
Table5:	Calculating emissions from 100 years life time wood product pool for 2005-2100
Table6:	Calculating sum of emissions from 1, 10, and 100 years life time wood product pools at eaqch year and from 2005-2100

## Sheet: Table1
Country specific (for Ethiopia) harvested wood production statistics from FAO statistical database at 2005
country	Chips and Particles	Hard-board	Insulating Board	MDF	Other Indust Roundwd(C)	Other Indust Roundwd(NC)	Particle Board	Ply-wood	Sawlogs+Veneer Logs (C)	Sawlogs+Veneer Logs (NC)	Sawn-wood (C)	Sawn-wood (NC)	Veneer Sheets	Wood Residues	Sum
Ethiopia	22500	200	0		1000	2916000	22000	24000	6000	5000	500	17400	56600	1000	3072200
% (of total production)	0.00732374	6.50999e-05	0	0	0.0003255	0.949157	0.00716099	0.00781199	0.001953	0.0016275	0.00016275	0.00566369	0.0184233	0.0003255

## Sheet: Table2
Allocation of harvested wood biomass from JSBACH to 14 FAO wood products catagories according to their percentages as in Table1
Date	Biomass Harvest (PgC)	Chips and Particles (PgC)	Hard-board (PgC)	Insulating Board (PgC)	MDF (PgC)	Other Indust Roundwd (c) (PgC)	Other Indust Roundwd(NC) (PgC)	Particle Board (PgC)	Ply-wood (PgC)	Sawlogs+Veneer Logs(c) (PgC)	Sawlogs+Veneer Logs (NC) (PgC)	Sawn-wood (c) (PgC)	Sawn-wood (NC) (PgC)	Veneer Sheets (PgC)	Wood Residues (PgC)
2006	0.00247956	1.81596e-05	1.61419e-07	0	0	8.07095e-07	0.00235349	1.77561e-05	1.93703e-05	4.84257e-06	4.03548e-06	4.03548e-07	1.40435e-05	4.56816e-05	8.07095e-07
2007	0.00414623	3.03659e-05	2.69919e-07	0	0	1.3496e-06	0.00393542	2.96911e-05	3.23903e-05	8.09758e-06	6.74798e-06	6.74798e-07	2.3483e-05	7.63871e-05	1.3496e-06
2008	0.027179	0.000199052	1.76935e-06	0	0	8.84674e-06	0.0257971	0.000194628	0.000212322	5.30804e-05	4.42337e-05	4.42337e-06	0.000153933	0.000500726	8.84674e-06
2009	0.0218902	0.000160318	1.42505e-06	0	0	7.12525e-06	0.0207772	0.000156755	0.000171006	4.27515e-05	3.56262e-05	3.56262e-06	0.000123979	0.000403289	7.12525e-06
2010	0.0171599	0.000125674	1.11711e-06	0	0	5.58553e-06	0.0162874	0.000122882	0.000134053	3.35132e-05	2.79276e-05	2.79276e-06	9.71882e-05	0.000316141	5.58553e-06
2011	0.00910909	6.67126e-05	5.93001e-07	0	0	2.96501e-06	0.00864596	6.52301e-05	7.11601e-05	1.779e-05	1.4825e-05	1.4825e-06	5.15911e-05	0.000167819	2.96501e-06
2012	0.0214868	0.000157364	1.39879e-06	0	0	6.99395e-06	0.0203944	0.000153867	0.000167855	4.19637e-05	3.49698e-05	3.49698e-06	0.000121695	0.000395858	6.99395e-06
2013	0.0345709	0.000253189	2.25056e-06	0	0	1.12528e-05	0.0328132	0.000247562	0.000270068	6.75169e-05	5.62641e-05	5.62641e-06	0.000195799	0.00063691	1.12528e-05
2014	0.0306166	0.000224228	1.99314e-06	0	0	9.96568e-06	0.0290599	0.000219245	0.000239176	5.97941e-05	4.98284e-05	4.98284e-06	0.000173403	0.000564057	9.96568e-06
2015	0.0280792	0.000205645	1.82795e-06	0	0	9.13977e-06	0.0266516	0.000201075	0.000219354	5.48386e-05	4.56988e-05	4.56988e-06	0.000159032	0.000517311	9.13977e-06
2016	0.0529351	0.000387683	3.44607e-06	0	0	1.72304e-05	0.0502437	0.000379068	0.000413529	0.000103382	8.61518e-05	8.61518e-06	0.000299808	0.000975239	1.72304e-05
2017	0.0258509	0.000189325	1.68289e-06	0	0	8.41444e-06	0.0245365	0.000185118	0.000201947	5.04867e-05	4.20722e-05	4.20722e-06	0.000146411	0.000476257	8.41444e-06
2018	0.0270494	0.000198103	1.76091e-06	0	0	8.80457e-06	0.0256741	0.000193701	0.00021131	5.28274e-05	4.40229e-05	4.40229e-06	0.0001532	0.000498339	8.80457e-06
2019	0.017327	0.000126899	1.12799e-06	0	0	5.63994e-06	0.0164461	0.000124079	0.000135358	3.38396e-05	2.81997e-05	2.81997e-06	9.81349e-05	0.00031922	5.63994e-06
2020	0.0314896	0.000230622	2.04997e-06	0	0	1.02499e-05	0.0298886	0.000225497	0.000245996	6.14991e-05	5.12493e-05	5.12493e-06	0.000178347	0.000580142	1.02499e-05
2021	0.00970798	7.10988e-05	6.31989e-07	0	0	3.15994e-06	0.0092144	6.95188e-05	7.58387e-05	1.89597e-05	1.57997e-05	1.57997e-06	5.4983e-05	0.000178853	3.15994e-06
2022	0.0261669	0.000191639	1.70346e-06	0	0	8.51731e-06	0.0248365	0.000187381	0.000204415	5.11038e-05	4.25865e-05	4.25865e-06	0.000148201	0.00048208	8.51731e-06
2023	0.0279996	0.000205062	1.82277e-06	0	0	9.11387e-06	0.026576	0.000200505	0.000218733	5.46832e-05	4.55693e-05	4.55693e-06	0.000158581	0.000515845	9.11387e-06
2024	0.0338473	0.000247889	2.20346e-06	0	0	1.10173e-05	0.0321264	0.00024238	0.000264415	6.61037e-05	5.50865e-05	5.50865e-06	0.000191701	0.000623579	1.10173e-05
2025	0.028804	0.000210953	1.87514e-06	0	0	9.37568e-06	0.0273395	0.000206265	0.000225016	5.62541e-05	4.68784e-05	4.68784e-06	0.000163137	0.000530663	9.37568e-06
2026	0.0385061	0.000282009	2.50675e-06	0	0	1.25337e-05	0.0365484	0.000275742	0.00030081	7.52024e-05	6.26687e-05	6.26687e-06	0.000218087	0.000709409	1.25337e-05
2027	0.0289986	0.000212378	1.88781e-06	0	0	9.43903e-06	0.0275242	0.000207659	0.000226537	5.66342e-05	4.71952e-05	4.71952e-06	0.000164239	0.000534249	9.43903e-06
2028	0.0394166	0.000288677	2.56602e-06	0	0	1.28301e-05	0.0374126	0.000282262	0.000307923	7.69806e-05	6.41505e-05	6.41505e-06	0.000223244	0.000726184	1.28301e-05
2029	0.0165393	0.00012113	1.07671e-06	0	0	5.38354e-06	0.0156984	0.000118438	0.000129205	3.23012e-05	2.69177e-05	2.69177e-06	9.36736e-05	0.000304708	5.38354e-06
2030	0.0339911	0.000248942	2.21282e-06	0	0	1.10641e-05	0.0322629	0.00024341	0.000265538	6.63845e-05	5.53204e-05	5.53204e-06	0.000192515	0.000626227	1.10641e-05
2031	0.0233419	0.00017095	1.51956e-06	0	0	7.59778e-06	0.0221551	0.000167151	0.000182347	4.55867e-05	3.79889e-05	3.79889e-06	0.000132201	0.000430034	7.59778e-06
2032	0.0396962	0.000290725	2.58422e-06	0	0	1.29211e-05	0.037678	0.000284264	0.000310107	7.75266e-05	6.46055e-05	6.46055e-06	0.000224827	0.000731335	1.29211e-05
2033	0.0274667	0.000201159	1.78808e-06	0	0	8.94039e-06	0.0260702	0.000196689	0.000214569	5.36424e-05	4.4702e-05	4.4702e-06	0.000155563	0.000506026	8.94039e-06
2034	0.0578362	0.000423578	3.76513e-06	0	0	1.88257e-05	0.0548957	0.000414165	0.000451816	0.000112954	9.41284e-05	9.41284e-06	0.000327567	0.00106553	1.88257e-05
2035	0.0440311	0.000322473	2.86642e-06	0	0	1.43321e-05	0.0417925	0.000315307	0.000343971	8.59927e-05	7.16606e-05	7.16606e-06	0.000249379	0.000811198	1.43321e-05
2036	0.0465522	0.000340937	3.03055e-06	0	0	1.51527e-05	0.0441854	0.00033336	0.000363666	9.09164e-05	7.57637e-05	7.57637e-06	0.000263658	0.000857645	1.51527e-05
2037	0.0316965	0.000232137	2.06344e-06	0	0	1.03172e-05	0.030085	0.000226979	0.000247613	6.19033e-05	5.15861e-05	5.15861e-06	0.000179519	0.000583954	1.03172e-05
2038	0.0325965	0.000238728	2.12203e-06	0	0	1.06101e-05	0.0309392	0.000233423	0.000254644	6.36609e-05	5.30507e-05	5.30507e-06	0.000184617	0.000600534	1.06101e-05
2039	0.0344297	0.000252154	2.24137e-06	0	0	1.12069e-05	0.0326792	0.000246551	0.000268964	6.72411e-05	5.60343e-05	5.60343e-06	0.000194999	0.000634308	1.12069e-05
2040	0.0332297	0.000243365	2.16325e-06	0	0	1.08162e-05	0.0315402	0.000237957	0.00025959	6.48974e-05	5.40812e-05	5.40812e-06	0.000188203	0.000612199	1.08162e-05
2041	0.0340608	0.000249453	2.21736e-06	0	0	1.10868e-05	0.0323291	0.000243909	0.000266083	6.65207e-05	5.54339e-05	5.54339e-06	0.00019291	0.000627512	1.10868e-05
2042	0.0325686	0.000238524	2.12021e-06	0	0	1.06011e-05	0.0309127	0.000233223	0.000254425	6.36064e-05	5.30053e-05	5.30053e-06	0.000184458	0.00060002	1.06011e-05
2043	0.0448882	0.000328749	2.92222e-06	0	0	1.46111e-05	0.0426059	0.000321444	0.000350666	8.76665e-05	7.30554e-05	7.30554e-06	0.000254233	0.000826987	1.46111e-05
2044	0.0604224	0.000442518	3.93349e-06	0	0	1.96675e-05	0.0573503	0.000432684	0.000472019	0.000118005	9.83374e-05	9.83374e-06	0.000342214	0.00111318	1.96675e-05
2045	0.0474724	0.000347676	3.09045e-06	0	0	1.54523e-05	0.0450588	0.00033995	0.000370854	9.27135e-05	7.72613e-05	7.72613e-06	0.000268869	0.000874598	1.54523e-05
2046	0.0226136	0.000165616	1.47214e-06	0	0	7.36071e-06	0.0214638	0.000161936	0.000176657	4.41643e-05	3.68036e-05	3.68036e-06	0.000128076	0.000416616	7.36071e-06
2047	0.028056	0.000205475	1.82644e-06	0	0	9.13222e-06	0.0266295	0.000200909	0.000219173	5.47933e-05	4.56611e-05	4.56611e-06	0.000158901	0.000516884	9.13222e-06
2048	0.0503277	0.000368587	3.27633e-06	0	0	1.63817e-05	0.0477689	0.000360396	0.00039316	9.82899e-05	8.19083e-05	8.19083e-06	0.000285041	0.000927202	1.63817e-05
2049	0.0246777	0.000180733	1.60652e-06	0	0	8.03258e-06	0.023423	0.000176717	0.000192782	4.81955e-05	4.01629e-05	4.01629e-06	0.000139767	0.000454644	8.03258e-06
2050	0.0182919	0.000133965	1.1908e-06	0	0	5.954e-06	0.0173619	0.000130988	0.000142896	3.5724e-05	2.977e-05	2.977e-06	0.0001036	0.000336996	5.954e-06
2051	0.0397208	0.000290905	2.58582e-06	0	0	1.29291e-05	0.0377013	0.00028444	0.000310299	7.75747e-05	6.46455e-05	6.46455e-06	0.000224966	0.000731788	1.29291e-05
2052	0.0540937	0.000396168	3.5215e-06	0	0	1.76075e-05	0.0513434	0.000387364	0.000422579	0.000105645	8.80374e-05	8.80374e-06	0.00030637	0.000996583	1.76075e-05
2053	0.0379797	0.000278154	2.47248e-06	0	0	1.23624e-05	0.0360487	0.000271973	0.000296697	7.41743e-05	6.18119e-05	6.18119e-06	0.000215106	0.000699711	1.23624e-05
2054	0.0831284	0.000608811	5.41165e-06	0	0	2.70583e-05	0.0789019	0.000595282	0.000649398	0.00016235	0.000135291	1.35291e-05	0.000470814	0.0015315	2.70583e-05
2055	0.08385	0.000614096	5.45863e-06	0	0	2.72932e-05	0.0795868	0.000600449	0.000655036	0.000163759	0.000136466	1.36466e-05	0.000474901	0.00154479	2.72932e-05
2056	0.0610241	0.000446925	3.97267e-06	0	0	1.98633e-05	0.0579215	0.000436993	0.00047672	0.00011918	9.93166e-05	9.93166e-06	0.000345622	0.00112426	1.98633e-05
2057	0.055713	0.000408028	3.62691e-06	0	0	1.81346e-05	0.0528804	0.00039896	0.00043523	0.000108807	9.06728e-05	9.06728e-06	0.000315541	0.00102642	1.81346e-05
2058	0.0267601	0.000195984	1.74208e-06	0	0	8.71042e-06	0.0253996	0.000191629	0.00020905	5.22625e-05	4.35521e-05	4.35521e-06	0.000151561	0.00049301	8.71042e-06
2059	0.0375462	0.000274979	2.44425e-06	0	0	1.22213e-05	0.0356372	0.000268868	0.00029331	7.33276e-05	6.11063e-05	6.11063e-06	0.00021265	0.000691724	1.22213e-05
2060	0.0416465	0.000305008	2.71119e-06	0	0	1.35559e-05	0.0395291	0.00029823	0.000325342	8.13356e-05	6.77796e-05	6.77796e-06	0.000235873	0.000767265	1.35559e-05
2061	0.0491634	0.00036006	3.20054e-06	0	0	1.60027e-05	0.0466638	0.000352059	0.000384064	9.60161e-05	8.00134e-05	8.00134e-06	0.000278447	0.000905752	1.60027e-05
2062	0.0529203	0.000387575	3.44511e-06	0	0	1.72255e-05	0.0502297	0.000378962	0.000413413	0.000103353	8.61277e-05	8.61277e-06	0.000299724	0.000974965	1.72255e-05
2063	0.0519788	0.000380679	3.38382e-06	0	0	1.69191e-05	0.0493361	0.00037222	0.000406058	0.000101515	8.45954e-05	8.45954e-06	0.000294392	0.00095762	1.69191e-05
2064	0.0643729	0.00047145	4.19067e-06	0	0	2.09533e-05	0.0610999	0.000460973	0.00050288	0.00012572	0.000104767	1.04767e-05	0.000364588	0.00118596	2.09533e-05
2065	0.0632096	0.000462931	4.11494e-06	0	0	2.05747e-05	0.0599959	0.000452644	0.000493793	0.000123448	0.000102874	1.02874e-05	0.000358	0.00116453	2.05747e-05
2066	0.0633415	0.000463897	4.12353e-06	0	0	2.06176e-05	0.060121	0.000453588	0.000494823	0.000123706	0.000103088	1.03088e-05	0.000358747	0.00116696	2.06176e-05
2067	0.0599302	0.000438913	3.90145e-06	0	0	1.95073e-05	0.0568832	0.00042916	0.000468174	0.000117044	9.75363e-05	9.75363e-06	0.000339426	0.00110411	1.95073e-05
2068	0.0303396	0.0002222	1.97511e-06	0	0	9.87554e-06	0.0287971	0.000217262	0.000237013	5.92532e-05	4.93777e-05	4.93777e-06	0.000171834	0.000558955	9.87554e-06
2069	0.0322206	0.000235975	2.09756e-06	0	0	1.04878e-05	0.0305824	0.000230731	0.000251707	6.29267e-05	5.24389e-05	5.24389e-06	0.000182487	0.000593608	1.04878e-05
2070	0.0485163	0.000355321	3.15841e-06	0	0	1.5792e-05	0.0460496	0.000347425	0.000379009	9.47523e-05	7.89602e-05	7.89602e-06	0.000274782	0.00089383	1.5792e-05
2071	0.0575921	0.000421789	3.74924e-06	0	0	1.87462e-05	0.0546639	0.000412416	0.000449909	0.000112477	9.3731e-05	9.3731e-06	0.000326184	0.00106103	1.87462e-05
2072	0.0636862	0.000466422	4.14597e-06	0	0	2.07298e-05	0.0604482	0.000456057	0.000497516	0.000124379	0.000103649	1.03649e-05	0.000360699	0.00117331	2.07298e-05
2073	0.109698	0.000803402	7.14135e-06	0	0	3.57068e-05	0.104121	0.000785549	0.000856962	0.000214241	0.000178534	1.78534e-05	0.000621298	0.002021	3.57068e-05
2074	0.0697317	0.000510697	4.53953e-06	0	0	2.26976e-05	0.0661863	0.000499348	0.000544743	0.000136186	0.000113488	1.13488e-05	0.000394939	0.00128469	2.26976e-05
2075	0.0553165	0.000405124	3.6011e-06	0	0	1.80055e-05	0.0525041	0.000396121	0.000432132	0.000108033	9.00276e-05	9.00276e-06	0.000313296	0.00101911	1.80055e-05
2076	0.0637553	0.000466928	4.15047e-06	0	0	2.07523e-05	0.0605138	0.000456551	0.000498056	0.000124514	0.000103762	1.03762e-05	0.000361091	0.00117458	2.07523e-05
2077	0.0766093	0.000561067	4.98726e-06	0	0	2.49363e-05	0.0727143	0.000548599	0.000598472	0.000149618	0.000124682	1.24682e-05	0.000433892	0.0014114	2.49363e-05
2078	0.119669	0.000876428	7.79047e-06	0	0	3.89524e-05	0.113585	0.000856952	0.000934857	0.000233714	0.000194762	1.94762e-05	0.000677771	0.0022047	3.89524e-05
2079	0.0504234	0.000369288	3.28256e-06	0	0	1.64128e-05	0.0478598	0.000361082	0.000393907	9.84769e-05	8.20641e-05	8.20641e-06	0.000285583	0.000928965	1.64128e-05
2080	0.0715551	0.000524051	4.65823e-06	0	0	2.32912e-05	0.067917	0.000512405	0.000558988	0.000139747	0.000116456	1.16456e-05	0.000405266	0.00131828	2.32912e-05
2081	0.0547861	0.000401239	3.56657e-06	0	0	1.78329e-05	0.0520006	0.000392323	0.000427989	0.000106997	8.91643e-05	8.91643e-06	0.000310292	0.00100934	1.78329e-05
2082	0.0654091	0.000479039	4.25813e-06	0	0	2.12906e-05	0.0620835	0.000468394	0.000510975	0.000127744	0.000106453	1.06453e-05	0.000370457	0.00120505	2.12906e-05
2083	0.0838041	0.00061376	5.45564e-06	0	0	2.72782e-05	0.0795433	0.000600121	0.000654677	0.000163669	0.000136391	1.36391e-05	0.000474641	0.00154395	2.72782e-05
2084	0.0713101	0.000522256	4.64228e-06	0	0	2.32114e-05	0.0676844	0.000510651	0.000557074	0.000139268	0.000116057	1.16057e-05	0.000403878	0.00131377	2.32114e-05
2085	0.0832293	0.00060955	5.41822e-06	0	0	2.70911e-05	0.0789977	0.000596004	0.000650186	0.000162547	0.000135456	1.35456e-05	0.000471385	0.00153336	2.70911e-05
2086	0.0664746	0.000486843	4.32749e-06	0	0	2.16375e-05	0.0630948	0.000476024	0.000519299	0.000129825	0.000108187	1.08187e-05	0.000376492	0.00122468	2.16375e-05
2087	0.0447235	0.000327544	2.9115e-06	0	0	1.45575e-05	0.0424496	0.000320265	0.00034938	8.73449e-05	7.27875e-05	7.27875e-06	0.0002533	0.000823954	1.45575e-05
2088	0.0788172	0.000577237	5.13099e-06	0	0	2.5655e-05	0.0748099	0.000564409	0.000615719	0.00015393	0.000128275	1.28275e-05	0.000446396	0.00145207	2.5655e-05
2089	0.0776353	0.000568581	5.05405e-06	0	0	2.52703e-05	0.0736881	0.000555946	0.000606486	0.000151622	0.000126351	1.26351e-05	0.000439703	0.0014303	2.52703e-05
2090	0.102104	0.000747784	6.64697e-06	0	0	3.32348e-05	0.0969128	0.000731166	0.000797636	0.000199409	0.000166174	1.66174e-05	0.000578286	0.00188109	3.32348e-05
2091	0.0704308	0.000515817	4.58504e-06	0	0	2.29252e-05	0.0668499	0.000504354	0.000550205	0.000137551	0.000114626	1.14626e-05	0.000398898	0.00129757	2.29252e-05
2092	0.0611979	0.000448198	3.98398e-06	0	0	1.99199e-05	0.0580864	0.000438238	0.000478078	0.000119519	9.95995e-05	9.95995e-06	0.000346606	0.00112747	1.99199e-05
2093	0.0370877	0.00027162	2.4144e-06	0	0	1.2072e-05	0.035202	0.000265584	0.000289729	7.24321e-05	6.03601e-05	6.03601e-06	0.000210053	0.000683276	1.2072e-05
2094	0.0861643	0.000631045	5.60929e-06	0	0	2.80465e-05	0.0817835	0.000617022	0.000673115	0.000168279	0.000140232	1.40232e-05	0.000488008	0.00158743	2.80465e-05
2095	0.0524784	0.000384338	3.41634e-06	0	0	1.70817e-05	0.0498102	0.000375797	0.000409961	0.00010249	8.54085e-05	8.54085e-06	0.000297222	0.000966824	1.70817e-05
2096	0.0825934	0.000604893	5.37683e-06	0	0	2.68841e-05	0.0783941	0.000591451	0.000645219	0.000161305	0.000134421	1.34421e-05	0.000467784	0.00152164	2.68841e-05
2097	0.0630407	0.000461694	4.10394e-06	0	0	2.05197e-05	0.0598355	0.000451434	0.000492473	0.000123118	0.000102599	1.02599e-05	0.000357043	0.00116142	2.05197e-05
2098	0.0735005	0.000538299	4.78488e-06	0	0	2.39244e-05	0.0697635	0.000526336	0.000574185	0.000143546	0.000119622	1.19622e-05	0.000416284	0.00135412	2.39244e-05
2099	0.0870311	0.000637393	5.66572e-06	0	0	2.83286e-05	0.0826061	0.000623229	0.000679886	0.000169971	0.000141643	1.41643e-05	0.000492917	0.0016034	2.83286e-05
2100	0.0540713	0.000396004	3.52004e-06	0	0	1.76002e-05	0.0513221	0.000387204	0.000422404	0.000105601	8.80009e-05	8.80009e-06	0.000306243	0.00099617	1.76002e-05

## Sheet: Table3
Re-allocating 14 wood products catagories (FAO stat catagories) to 3 anthropogenic wood pools ith 3 differenet life times (1, 10, and 100 years)
Date	1-year pool (PgC)	10-year pool (PgC)	100-year pool (PgC)
2006	1.89667e-05	0.000239158	6.90066e-05
2007	3.17155e-05	0.000399912	0.00011539
2008	0.000207898	0.00262147	0.000756396
2009	0.000167443	0.00211135	0.000609209
2010	0.00013126	0.0016551	0.000477562
2011	6.96776e-05	0.00087859	0.000253508
2012	0.000164358	0.00207245	0.000597983
2013	0.000264441	0.00333444	0.000962117
2014	0.000234193	0.00295303	0.000852065
2015	0.000214785	0.0027083	0.00078145
2016	0.000404914	0.0051057	0.0014732
2017	0.000197739	0.00249337	0.000719435
2018	0.000206907	0.00260897	0.000752791
2019	0.000132538	0.00167123	0.000482215
2020	0.000240872	0.00303724	0.000876362
2021	7.42587e-05	0.000936355	0.000270175
2022	0.000200157	0.00252385	0.00072823
2023	0.000214176	0.00270062	0.000779236
2024	0.000258906	0.00326464	0.000941978
2025	0.000220328	0.0027782	0.00080162
2026	0.000294543	0.003714	0.00107163
2027	0.000221817	0.00279697	0.000807037
2028	0.000301507	0.00380182	0.00109697
2029	0.000126513	0.00159525	0.000460293
2030	0.000260006	0.00327851	0.000945979
2031	0.000178548	0.00225137	0.00064961
2032	0.000303646	0.00382878	0.00110475
2033	0.000210099	0.00264922	0.000764404
2034	0.000442403	0.00557842	0.00160959
2035	0.000336805	0.00424689	0.0012254
2036	0.000356089	0.00449006	0.00129556
2037	0.000242454	0.0030572	0.000882122
2038	0.000249339	0.003144	0.000907168
2039	0.000263361	0.00332081	0.000958186
2040	0.000254182	0.00320507	0.000924789
2041	0.000260539	0.00328524	0.00094792
2042	0.000249125	0.00314131	0.000906391
2043	0.00034336	0.00432956	0.00124925
2044	0.000462186	0.00582786	0.00168157
2045	0.000363128	0.00457881	0.00132117
2046	0.000172977	0.00218113	0.000629341
2047	0.000214607	0.00270606	0.000780805
2048	0.000384969	0.00485421	0.00140063
2049	0.000188766	0.00238021	0.000686786
2050	0.000139919	0.00176429	0.000509067
2051	0.000303834	0.00383115	0.00110544
2052	0.000413776	0.00521745	0.00150544
2053	0.000290516	0.00366322	0.00105698
2054	0.000635869	0.0080179	0.00231348
2055	0.000641389	0.00808751	0.00233356
2056	0.000466788	0.0058859	0.00169831
2057	0.000426162	0.00537363	0.00155051
2058	0.000204695	0.00258107	0.000744741
2059	0.0002872	0.00362141	0.00104492
2060	0.000318564	0.00401689	0.00115903
2061	0.000376063	0.00474191	0.00136823
2062	0.0004048	0.00510427	0.00147278
2063	0.000397599	0.00501346	0.00144658
2064	0.000492403	0.00620889	0.00179151
2065	0.000483506	0.0060967	0.00175914
2066	0.000484514	0.00610942	0.00176281
2067	0.000458421	0.00578039	0.00166787
2068	0.000232075	0.00292632	0.000844358
2069	0.000246463	0.00310774	0.000896705
2070	0.000371113	0.0046795	0.00135022
2071	0.000440536	0.00555487	0.0016028
2072	0.000487151	0.00614267	0.0017724
2073	0.000839109	0.0105806	0.00305293
2074	0.000533394	0.00672576	0.00194065
2075	0.00042313	0.00533539	0.00153947
2076	0.00048768	0.00614933	0.00177433
2077	0.000586003	0.00738913	0.00213205
2078	0.000915381	0.0115424	0.00333043
2079	0.000385701	0.00486344	0.0014033
2080	0.000547342	0.00690163	0.00199139
2081	0.000419072	0.00528423	0.00152471
2082	0.00050033	0.00630884	0.00182035
2083	0.000641038	0.00808308	0.00233229
2084	0.000545468	0.006878	0.00198457
2085	0.000636641	0.00802764	0.00231629
2086	0.00050848	0.00641161	0.00185
2087	0.000342101	0.00431368	0.00124467
2088	0.000602892	0.00760208	0.0021935
2089	0.000593851	0.00748809	0.00216061
2090	0.000781019	0.00984815	0.00284158
2091	0.000538742	0.00679319	0.0019601
2092	0.000468118	0.00590267	0.00170315
2093	0.000283693	0.00357718	0.00103216
2094	0.000659092	0.00831073	0.00239797
2095	0.00040142	0.00506165	0.00146049
2096	0.000631777	0.00796631	0.00229859
2097	0.000482213	0.0060804	0.00175444
2098	0.000562223	0.00708927	0.00204553
2099	0.000665722	0.00839433	0.00242209
2100	0.000413604	0.00521529	0.00150482

## Sheet: Table4
Calculating emissions from 10 years life time wood product pool for 2005-2100
Date	10-year pool (PgC)	2007	2008	2009	2010	2011	2012	2013	2014	2015	2016	2017	2018	2019	2020	2021	2022	2023	2024	2025	2026	2027	2028	2029	2030	2031	2032	2033	2034	2035	2036	2037	2038	2039	2040	2041	2042	2043	2044	2045	2046	2047	2048	2049	2050	2051	2052	2053	2054
2006	0.000239158	0.000239158	0.000239158	0.000239158	0.000239158	0.000239158	0.000239158	0.000239158	0.000239158	0.000239158	0.000239158	0	0	0	0	0	0	0	0	0	0	0	0	0	0	0	0	0	0	0	0	0	0	0	0	0	0	0	0	0	0	0	0	0	0	0	0	0	0
2007	0.000399912	0	0.000399912	0.000399912	0.000399912	0.000399912	0.000399912	0.000399912	0.000399912	0.000399912	0.000399912	0.000399912	0	0	0	0	0	0	0	0	0	0	0	0	0	0	0	0	0	0	0	0	0	0	0	0	0	0	0	0	0	0	0	0	0	0	0	0	0
2008	0.00262147	0	0	0.00262147	0.00262147	0.00262147	0.00262147	0.00262147	0.00262147	0.00262147	0.00262147	0.00262147	0.00262147	0	0	0	0	0	0	0	0	0	0	0	0	0	0	0	0	0	0	0	0	0	0	0	0	0	0	0	0	0	0	0	0	0	0	0	0
2009	0.00211135	0	0	0	0.00211135	0.00211135	0.00211135	0.00211135	0.00211135	0.00211135	0.00211135	0.00211135	0.00211135	0.00211135	0	0	0	0	0	0	0	0	0	0	0	0	0	0	0	0	0	0	0	0	0	0	0	0	0	0	0	0	0	0	0	0	0	0	0
2010	0.0016551	0	0	0	0	0.0016551	0.0016551	0.0016551	0.0016551	0.0016551	0.0016551	0.0016551	0.0016551	0.0016551	0.0016551	0	0	0	0	0	0	0	0	0	0	0	0	0	0	0	0	0	0	0	0	0	0	0	0	0	0	0	0	0	0	0	0	0	0
2011	0.00087859	0	0	0	0	0	0.00087859	0.00087859	0.00087859	0.00087859	0.00087859	0.00087859	0.00087859	0.00087859	0.00087859	0.00087859	0	0	0	0	0	0	0	0	0	0	0	0	0	0	0	0	0	0	0	0	0	0	0	0	0	0	0	0	0	0	0	0	0
2012	0.00207245	0	0	0	0	0	0	0.00207245	0.00207245	0.00207245	0.00207245	0.00207245	0.00207245	0.00207245	0.00207245	0.00207245	0.00207245	0	0	0	0	0	0	0	0	0	0	0	0	0	0	0	0	0	0	0	0	0	0	0	0	0	0	0	0	0	0	0	0
2013	0.00333444	0	0	0	0	0	0	0	0.00333444	0.00333444	0.00333444	0.00333444	0.00333444	0.00333444	0.00333444	0.00333444	0.00333444	0.00333444	0	0	0	0	0	0	0	0	0	0	0	0	0	0	0	0	0	0	0	0	0	0	0	0	0	0	0	0	0	0	0
2014	0.00295303	0	0	0	0	0	0	0	0	0.00295303	0.00295303	0.00295303	0.00295303	0.00295303	0.00295303	0.00295303	0.00295303	0.00295303	0.00295303	0	0	0	0	0	0	0	0	0	0	0	0	0	0	0	0	0	0	0	0	0	0	0	0	0	0	0	0	0	0
2015	0.0027083	0	0	0	0	0	0	0	0	0	0.0027083	0.0027083	0.0027083	0.0027083	0.0027083	0.0027083	0.0027083	0.0027083	0.0027083	0.0027083	0	0	0	0	0	0	0	0	0	0	0	0	0	0	0	0	0	0	0	0	0	0	0	0	0	0	0	0	0
2016	0.0051057	0	0	0	0	0	0	0	0	0	0	0.0051057	0.0051057	0.0051057	0.0051057	0.0051057	0.0051057	0.0051057	0.0051057	0.0051057	0.0051057	0	0	0	0	0	0	0	0	0	0	0	0	0	0	0	0	0	0	0	0	0	0	0	0	0	0	0	0
2017	0.00249337	0	0	0	0	0	0	0	0	0	0	0	0.00249337	0.00249337	0.00249337	0.00249337	0.00249337	0.00249337	0.00249337	0.00249337	0.00249337	0.00249337	0	0	0	0	0	0	0	0	0	0	0	0	0	0	0	0	0	0	0	0	0	0	0	0	0	0	0
2018	0.00260897	0	0	0	0	0	0	0	0	0	0	0	0	0.00260897	0.00260897	0.00260897	0.00260897	0.00260897	0.00260897	0.00260897	0.00260897	0.00260897	0.00260897	0	0	0	0	0	0	0	0	0	0	0	0	0	0	0	0	0	0	0	0	0	0	0	0	0	0
2019	0.00167123	0	0	0	0	0	0	0	0	0	0	0	0	0	0.00167123	0.00167123	0.00167123	0.00167123	0.00167123	0.00167123	0.00167123	0.00167123	0.00167123	0.00167123	0	0	0	0	0	0	0	0	0	0	0	0	0	0	0	0	0	0	0	0	0	0	0	0	0
2020	0.00303724	0	0	0	0	0	0	0	0	0	0	0	0	0	0	0.00303724	0.00303724	0.00303724	0.00303724	0.00303724	0.00303724	0.00303724	0.00303724	0.00303724	0.00303724	0	0	0	0	0	0	0	0	0	0	0	0	0	0	0	0	0	0	0	0	0	0	0	0
2021	0.000936355	0	0	0	0	0	0	0	0	0	0	0	0	0	0	0	0.000936355	0.000936355	0.000936355	0.000936355	0.000936355	0.000936355	0.000936355	0.000936355	0.000936355	0.000936355	0	0	0	0	0	0	0	0	0	0	0	0	0	0	0	0	0	0	0	0	0	0	0
2022	0.00252385	0	0	0	0	0	0	0	0	0	0	0	0	0	0	0	0	0.00252385	0.00252385	0.00252385	0.00252385	0.00252385	0.00252385	0.00252385	0.00252385	0.00252385	0.00252385	0	0	0	0	0	0	0	0	0	0	0	0	0	0	0	0	0	0	0	0	0	0
2023	0.00270062	0	0	0	0	0	0	0	0	0	0	0	0	0	0	0	0	0	0.00270062	0.00270062	0.00270062	0.00270062	0.00270062	0.00270062	0.00270062	0.00270062	0.00270062	0.00270062	0	0	0	0	0	0	0	0	0	0	0	0	0	0	0	0	0	0	0	0	0
2024	0.00326464	0	0	0	0	0	0	0	0	0	0	0	0	0	0	0	0	0	0	0.00326464	0.00326464	0.00326464	0.00326464	0.00326464	0.00326464	0.00326464	0.00326464	0.00326464	0.00326464	0	0	0	0	0	0	0	0	0	0	0	0	0	0	0	0	0	0	0	0
2025	0.0027782	0	0	0	0	0	0	0	0	0	0	0	0	0	0	0	0	0	0	0	0.0027782	0.0027782	0.0027782	0.0027782	0.0027782	0.0027782	0.0027782	0.0027782	0.0027782	0.0027782	0	0	0	0	0	0	0	0	0	0	0	0	0	0	0	0	0	0	0
2026	0.003714	0	0	0	0	0	0	0	0	0	0	0	0	0	0	0	0	0	0	0	0	0.003714	0.003714	0.003714	0.003714	0.003714	0.003714	0.003714	0.003714	0.003714	0.003714	0	0	0	0	0	0	0	0	0	0	0	0	0	0	0	0	0	0
2027	0.00279697	0	0	0	0	0	0	0	0	0	0	0	0	0	0	0	0	0	0	0	0	0	0.00279697	0.00279697	0.00279697	0.00279697	0.00279697	0.00279697	0.00279697	0.00279697	0.00279697	0.00279697	0	0	0	0	0	0	0	0	0	0	0	0	0	0	0	0	0
2028	0.00380182	0	0	0	0	0	0	0	0	0	0	0	0	0	0	0	0	0	0	0	0	0	0	0.00380182	0.00380182	0.00380182	0.00380182	0.00380182	0.00380182	0.00380182	0.00380182	0.00380182	0.00380182	0	0	0	0	0	0	0	0	0	0	0	0	0	0	0	0
2029	0.00159525	0	0	0	0	0	0	0	0	0	0	0	0	0	0	0	0	0	0	0	0	0	0	0	0.00159525	0.00159525	0.00159525	0.00159525	0.00159525	0.00159525	0.00159525	0.00159525	0.00159525	0.00159525	0	0	0	0	0	0	0	0	0	0	0	0	0	0	0
2030	0.00327851	0	0	0	0	0	0	0	0	0	0	0	0	0	0	0	0	0	0	0	0	0	0	0	0	0.00327851	0.00327851	0.00327851	0.00327851	0.00327851	0.00327851	0.00327851	0.00327851	0.00327851	0.00327851	0	0	0	0	0	0	0	0	0	0	0	0	0	0
2031	0.00225137	0	0	0	0	0	0	0	0	0	0	0	0	0	0	0	0	0	0	0	0	0	0	0	0	0	0.00225137	0.00225137	0.00225137	0.00225137	0.00225137	0.00225137	0.00225137	0.00225137	0.00225137	0.00225137	0	0	0	0	0	0	0	0	0	0	0	0	0
2032	0.00382878	0	0	0	0	0	0	0	0	0	0	0	0	0	0	0	0	0	0	0	0	0	0	0	0	0	0	0.00382878	0.00382878	0.00382878	0.00382878	0.00382878	0.00382878	0.00382878	0.00382878	0.00382878	0.00382878	0	0	0	0	0	0	0	0	0	0	0	0
2033	0.00264922	0	0	0	0	0	0	0	0	0	0	0	0	0	0	0	0	0	0	0	0	0	0	0	0	0	0	0	0.00264922	0.00264922	0.00264922	0.00264922	0.00264922	0.00264922	0.00264922	0.00264922	0.00264922	0.00264922	0	0	0	0	0	0	0	0	0	0	0
2034	0.00557842	0	0	0	0	0	0	0	0	0	0	0	0	0	0	0	0	0	0	0	0	0	0	0	0	0	0	0	0	0.00557842	0.00557842	0.00557842	0.00557842	0.00557842	0.00557842	0.00557842	0.00557842	0.00557842	0.00557842	0	0	0	0	0	0	0	0	0	0
2035	0.00424689	0	0	0	0	0	0	0	0	0	0	0	0	0	0	0	0	0	0	0	0	0	0	0	0	0	0	0	0	0	0.00424689	0.00424689	0.00424689	0.00424689	0.00424689	0.00424689	0.00424689	0.00424689	0.00424689	0.00424689	0	0	0	0	0	0	0	0	0
2036	0.00449006	0	0	0	0	0	0	0	0	0	0	0	0	0	0	0	0	0	0	0	0	0	0	0	0	0	0	0	0	0	0	0.00449006	0.00449006	0.00449006	0.00449006	0.00449006	0.00449006	0.00449006	0.00449006	0.00449006	0.00449006	0	0	0	0	0	0	0	0
2037	0.0030572	0	0	0	0	0	0	0	0	0	0	0	0	0	0	0	0	0	0	0	0	0	0	0	0	0	0	0	0	0	0	0	0.0030572	0.0030572	0.0030572	0.0030572	0.0030572	0.0030572	0.0030572	0.0030572	0.0030572	0.0030572	0	0	0	0	0	0	0
2038	0.003144	0	0	0	0	0	0	0	0	0	0	0	0	0	0	0	0	0	0	0	0	0	0	0	0	0	0	0	0	0	0	0	0	0.003144	0.003144	0.003144	0.003144	0.003144	0.003144	0.003144	0.003144	0.003144	0.003144	0	0	0	0	0	0
2039	0.00332081	0	0	0	0	0	0	0	0	0	0	0	0	0	0	0	0	0	0	0	0	0	0	0	0	0	0	0	0	0	0	0	0	0	0.00332081	0.00332081	0.00332081	0.00332081	0.00332081	0.00332081	0.00332081	0.00332081	0.00332081	0.00332081	0	0	0	0	0
2040	0.00320507	0	0	0	0	0	0	0	0	0	0	0	0	0	0	0	0	0	0	0	0	0	0	0	0	0	0	0	0	0	0	0	0	0	0	0.00320507	0.00320507	0.00320507	0.00320507	0.00320507	0.00320507	0.00320507	0.00320507	0.00320507	0.00320507	0	0	0	0
2041	0.00328524	0	0	0	0	0	0	0	0	0	0	0	0	0	0	0	0	0	0	0	0	0	0	0	0	0	0	0	0	0	0	0	0	0	0	0	0.00328524	0.00328524	0.00328524	0.00328524	0.00328524	0.00328524	0.00328524	0.00328524	0.00328524	0.00328524	0	0	0
2042	0.00314131	0	0	0	0	0	0	0	0	0	0	0	0	0	0	0	0	0	0	0	0	0	0	0	0	0	0	0	0	0	0	0	0	0	0	0	0	0.00314131	0.00314131	0.00314131	0.00314131	0.00314131	0.00314131	0.00314131	0.00314131	0.00314131	0.00314131	0	0
2043	0.00432956	0	0	0	0	0	0	0	0	0	0	0	0	0	0	0	0	0	0	0	0	0	0	0	0	0	0	0	0	0	0	0	0	0	0	0	0	0	0.00432956	0.00432956	0.00432956	0.00432956	0.00432956	0.00432956	0.00432956	0.00432956	0.00432956	0.00432956	0
2044	0.00582786	0	0	0	0	0	0	0	0	0	0	0	0	0	0	0	0	0	0	0	0	0	0	0	0	0	0	0	0	0	0	0	0	0	0	0	0	0	0	0.00582786	0.00582786	0.00582786	0.00582786	0.00582786	0.00582786	0.00582786	0.00582786	0.00582786	0.00582786
2045	0.00457881	0	0	0	0	0	0	0	0	0	0	0	0	0	0	0	0	0	0	0	0	0	0	0	0	0	0	0	0	0	0	0	0	0	0	0	0	0	0	0	0.00457881	0.00457881	0.00457881	0.00457881	0.00457881	0.00457881	0.00457881	0.00457881	0.00457881
2046	0.00218113	0	0	0	0	0	0	0	0	0	0	0	0	0	0	0	0	0	0	0	0	0	0	0	0	0	0	0	0	0	0	0	0	0	0	0	0	0	0	0	0	0.00218113	0.00218113	0.00218113	0.00218113	0.00218113	0.00218113	0.00218113	0.00218113
2047	0.00270606	0	0	0	0	0	0	0	0	0	0	0	0	0	0	0	0	0	0	0	0	0	0	0	0	0	0	0	0	0	0	0	0	0	0	0	0	0	0	0	0	0	0.00270606	0.00270606	0.00270606	0.00270606	0.00270606	0.00270606	0.00270606
2048	0.00485421	0	0	0	0	0	0	0	0	0	0	0	0	0	0	0	0	0	0	0	0	0	0	0	0	0	0	0	0	0	0	0	0	0	0	0	0	0	0	0	0	0	0	0.00485421	0.00485421	0.00485421	0.00485421	0.00485421	0.00485421
2049	0.00238021	0	0	0	0	0	0	0	0	0	0	0	0	0	0	0	0	0	0	0	0	0	0	0	0	0	0	0	0	0	0	0	0	0	0	0	0	0	0	0	0	0	0	0	0.00238021	0.00238021	0.00238021	0.00238021	0.00238021
2050	0.00176429	0	0	0	0	0	0	0	0	0	0	0	0	0	0	0	0	0	0	0	0	0	0	0	0	0	0	0	0	0	0	0	0	0	0	0	0	0	0	0	0	0	0	0	0	0.00176429	0.00176429	0.00176429	0.00176429
2051	0.00383115	0	0	0	0	0	0	0	0	0	0	0	0	0	0	0	0	0	0	0	0	0	0	0	0	0	0	0	0	0	0	0	0	0	0	0	0	0	0	0	0	0	0	0	0	0	0.00383115	0.00383115	0.00383115
2052	0.00521745	0	0	0	0	0	0	0	0	0	0	0	0	0	0	0	0	0	0	0	0	0	0	0	0	0	0	0	0	0	0	0	0	0	0	0	0	0	0	0	0	0	0	0	0	0	0	0.00521745	0.00521745
2053	0.00366322	0	0	0	0	0	0	0	0	0	0	0	0	0	0	0	0	0	0	0	0	0	0	0	0	0	0	0	0	0	0	0	0	0	0	0	0	0	0	0	0	0	0	0	0	0	0	0	0.00366322
2054	0.0080179	0	0	0	0	0	0	0	0	0	0	0	0	0	0	0	0	0	0	0	0	0	0	0	0	0	0	0	0	0	0	0	0	0	0	0	0	0	0	0	0	0	0	0	0	0	0	0	0
2055	0.00808751	0	0	0	0	0	0	0	0	0	0	0	0	0	0	0	0	0	0	0	0	0	0	0	0	0	0	0	0	0	0	0	0	0	0	0	0	0	0	0	0	0	0	0	0	0	0	0	0
2056	0.0058859	0	0	0	0	0	0	0	0	0	0	0	0	0	0	0	0	0	0	0	0	0	0	0	0	0	0	0	0	0	0	0	0	0	0	0	0	0	0	0	0	0	0	0	0	0	0	0	0
2057	0.00537363	0	0	0	0	0	0	0	0	0	0	0	0	0	0	0	0	0	0	0	0	0	0	0	0	0	0	0	0	0	0	0	0	0	0	0	0	0	0	0	0	0	0	0	0	0	0	0	0
2058	0.00258107	0	0	0	0	0	0	0	0	0	0	0	0	0	0	0	0	0	0	0	0	0	0	0	0	0	0	0	0	0	0	0	0	0	0	0	0	0	0	0	0	0	0	0	0	0	0	0	0
2059	0.00362141	0	0	0	0	0	0	0	0	0	0	0	0	0	0	0	0	0	0	0	0	0	0	0	0	0	0	0	0	0	0	0	0	0	0	0	0	0	0	0	0	0	0	0	0	0	0	0	0
2060	0.00401689	0	0	0	0	0	0	0	0	0	0	0	0	0	0	0	0	0	0	0	0	0	0	0	0	0	0	0	0	0	0	0	0	0	0	0	0	0	0	0	0	0	0	0	0	0	0	0	0
2061	0.00474191	0	0	0	0	0	0	0	0	0	0	0	0	0	0	0	0	0	0	0	0	0	0	0	0	0	0	0	0	0	0	0	0	0	0	0	0	0	0	0	0	0	0	0	0	0	0	0	0
2062	0.00510427	0	0	0	0	0	0	0	0	0	0	0	0	0	0	0	0	0	0	0	0	0	0	0	0	0	0	0	0	0	0	0	0	0	0	0	0	0	0	0	0	0	0	0	0	0	0	0	0
2063	0.00501346	0	0	0	0	0	0	0	0	0	0	0	0	0	0	0	0	0	0	0	0	0	0	0	0	0	0	0	0	0	0	0	0	0	0	0	0	0	0	0	0	0	0	0	0	0	0	0	0
2064	0.00620889	0	0	0	0	0	0	0	0	0	0	0	0	0	0	0	0	0	0	0	0	0	0	0	0	0	0	0	0	0	0	0	0	0	0	0	0	0	0	0	0	0	0	0	0	0	0	0	0
2065	0.0060967	0	0	0	0	0	0	0	0	0	0	0	0	0	0	0	0	0	0	0	0	0	0	0	0	0	0	0	0	0	0	0	0	0	0	0	0	0	0	0	0	0	0	0	0	0	0	0	0
2066	0.00610942	0	0	0	0	0	0	0	0	0	0	0	0	0	0	0	0	0	0	0	0	0	0	0	0	0	0	0	0	0	0	0	0	0	0	0	0	0	0	0	0	0	0	0	0	0	0	0	0
2067	0.00578039	0	0	0	0	0	0	0	0	0	0	0	0	0	0	0	0	0	0	0	0	0	0	0	0	0	0	0	0	0	0	0	0	0	0	0	0	0	0	0	0	0	0	0	0	0	0	0	0
2068	0.00292632	0	0	0	0	0	0	0	0	0	0	0	0	0	0	0	0	0	0	0	0	0	0	0	0	0	0	0	0	0	0	0	0	0	0	0	0	0	0	0	0	0	0	0	0	0	0	0	0
2069	0.00310774	0	0	0	0	0	0	0	0	0	0	0	0	0	0	0	0	0	0	0	0	0	0	0	0	0	0	0	0	0	0	0	0	0	0	0	0	0	0	0	0	0	0	0	0	0	0	0	0
2070	0.0046795	0	0	0	0	0	0	0	0	0	0	0	0	0	0	0	0	0	0	0	0	0	0	0	0	0	0	0	0	0	0	0	0	0	0	0	0	0	0	0	0	0	0	0	0	0	0	0	0
2071	0.00555487	0	0	0	0	0	0	0	0	0	0	0	0	0	0	0	0	0	0	0	0	0	0	0	0	0	0	0	0	0	0	0	0	0	0	0	0	0	0	0	0	0	0	0	0	0	0	0	0
2072	0.00614267	0	0	0	0	0	0	0	0	0	0	0	0	0	0	0	0	0	0	0	0	0	0	0	0	0	0	0	0	0	0	0	0	0	0	0	0	0	0	0	0	0	0	0	0	0	0	0	0
2073	0.0105806	0	0	0	0	0	0	0	0	0	0	0	0	0	0	0	0	0	0	0	0	0	0	0	0	0	0	0	0	0	0	0	0	0	0	0	0	0	0	0	0	0	0	0	0	0	0	0	0
2074	0.00672576	0	0	0	0	0	0	0	0	0	0	0	0	0	0	0	0	0	0	0	0	0	0	0	0	0	0	0	0	0	0	0	0	0	0	0	0	0	0	0	0	0	0	0	0	0	0	0	0
2075	0.00533539	0	0	0	0	0	0	0	0	0	0	0	0	0	0	0	0	0	0	0	0	0	0	0	0	0	0	0	0	0	0	0	0	0	0	0	0	0	0	0	0	0	0	0	0	0	0	0	0
2076	0.00614933	0	0	0	0	0	0	0	0	0	0	0	0	0	0	0	0	0	0	0	0	0	0	0	0	0	0	0	0	0	0	0	0	0	0	0	0	0	0	0	0	0	0	0	0	0	0	0	0
2077	0.00738913	0	0	0	0	0	0	0	0	0	0	0	0	0	0	0	0	0	0	0	0	0	0	0	0	0	0	0	0	0	0	0	0	0	0	0	0	0	0	0	0	0	0	0	0	0	0	0	0
2078	0.0115424	0	0	0	0	0	0	0	0	0	0	0	0	0	0	0	0	0	0	0	0	0	0	0	0	0	0	0	0	0	0	0	0	0	0	0	0	0	0	0	0	0	0	0	0	0	0	0	0
2079	0.00486344	0	0	0	0	0	0	0	0	0	0	0	0	0	0	0	0	0	0	0	0	0	0	0	0	0	0	0	0	0	0	0	0	0	0	0	0	0	0	0	0	0	0	0	0	0	0	0	0
2080	0.00690163	0	0	0	0	0	0	0	0	0	0	0	0	0	0	0	0	0	0	0	0	0	0	0	0	0	0	0	0	0	0	0	0	0	0	0	0	0	0	0	0	0	0	0	0	0	0	0	0
2081	0.00528423	0	0	0	0	0	0	0	0	0	0	0	0	0	0	0	0	0	0	0	0	0	0	0	0	0	0	0	0	0	0	0	0	0	0	0	0	0	0	0	0	0	0	0	0	0	0	0	0
2082	0.00630884	0	0	0	0	0	0	0	0	0	0	0	0	0	0	0	0	0	0	0	0	0	0	0	0	0	0	0	0	0	0	0	0	0	0	0	0	0	0	0	0	0	0	0	0	0	0	0	0
2083	0.00808308	0	0	0	0	0	0	0	0	0	0	0	0	0	0	0	0	0	0	0	0	0	0	0	0	0	0	0	0	0	0	0	0	0	0	0	0	0	0	0	0	0	0	0	0	0	0	0	0
2084	0.006878	0	0	0	0	0	0	0	0	0	0	0	0	0	0	0	0	0	0	0	0	0	0	0	0	0	0	0	0	0	0	0	0	0	0	0	0	0	0	0	0	0	0	0	0	0	0	0	0
2085	0.00802764	0	0	0	0	0	0	0	0	0	0	0	0	0	0	0	0	0	0	0	0	0	0	0	0	0	0	0	0	0	0	0	0	0	0	0	0	0	0	0	0	0	0	0	0	0	0	0	0
2086	0.00641161	0	0	0	0	0	0	0	0	0	0	0	0	0	0	0	0	0	0	0	0	0	0	0	0	0	0	0	0	0	0	0	0	0	0	0	0	0	0	0	0	0	0	0	0	0	0	0	0
2087	0.00431368	0	0	0	0	0	0	0	0	0	0	0	0	0	0	0	0	0	0	0	0	0	0	0	0	0	0	0	0	0	0	0	0	0	0	0	0	0	0	0	0	0	0	0	0	0	0	0	0
2088	0.00760208	0	0	0	0	0	0	0	0	0	0	0	0	0	0	0	0	0	0	0	0	0	0	0	0	0	0	0	0	0	0	0	0	0	0	0	0	0	0	0	0	0	0	0	0	0	0	0	0
2089	0.00748809	0	0	0	0	0	0	0	0	0	0	0	0	0	0	0	0	0	0	0	0	0	0	0	0	0	0	0	0	0	0	0	0	0	0	0	0	0	0	0	0	0	0	0	0	0	0	0	0
2090	0.00984815	0	0	0	0	0	0	0	0	0	0	0	0	0	0	0	0	0	0	0	0	0	0	0	0	0	0	0	0	0	0	0	0	0	0	0	0	0	0	0	0	0	0	0	0	0	0	0	0
2091	0.00679319	0	0	0	0	0	0	0	0	0	0	0	0	0	0	0	0	0	0	0	0	0	0	0	0	0	0	0	0	0	0	0	0	0	0	0	0	0	0	0	0	0	0	0	0	0	0	0	0
2092	0.00590267	0	0	0	0	0	0	0	0	0	0	0	0	0	0	0	0	0	0	0	0	0	0	0	0	0	0	0	0	0	0	0	0	0	0	0	0	0	0	0	0	0	0	0	0	0	0	0	0
2093	0.00357718	0	0	0	0	0	0	0	0	0	0	0	0	0	0	0	0	0	0	0	0	0	0	0	0	0	0	0	0	0	0	0	0	0	0	0	0	0	0	0	0	0	0	0	0	0	0	0	0
2094	0.00831073	0	0	0	0	0	0	0	0	0	0	0	0	0	0	0	0	0	0	0	0	0	0	0	0	0	0	0	0	0	0	0	0	0	0	0	0	0	0	0	0	0	0	0	0	0	0	0	0
2095	0.00506165	0	0	0	0	0	0	0	0	0	0	0	0	0	0	0	0	0	0	0	0	0	0	0	0	0	0	0	0	0	0	0	0	0	0	0	0	0	0	0	0	0	0	0	0	0	0	0	0
2096	0.00796631	0	0	0	0	0	0	0	0	0	0	0	0	0	0	0	0	0	0	0	0	0	0	0	0	0	0	0	0	0	0	0	0	0	0	0	0	0	0	0	0	0	0	0	0	0	0	0	0
2097	0.0060804	0	0	0	0	0	0	0	0	0	0	0	0	0	0	0	0	0	0	0	0	0	0	0	0	0	0	0	0	0	0	0	0	0	0	0	0	0	0	0	0	0	0	0	0	0	0	0	0
2098	0.00708927	0	0	0	0	0	0	0	0	0	0	0	0	0	0	0	0	0	0	0	0	0	0	0	0	0	0	0	0	0	0	0	0	0	0	0	0	0	0	0	0	0	0	0	0	0	0	0	0
2099	0.00839433	0	0	0	0	0	0	0	0	0	0	0	0	0	0	0	0	0	0	0	0	0	0	0	0	0	0	0	0	0	0	0	0	0	0	0	0	0	0	0	0	0	0	0	0	0	0	0	0
2100	0.00521529	0	0	0	0	0	0	0	0	0	0	0	0	0	0	0	0	0	0	0	0	0	0	0	0	0	0	0	0	0	0	0	0	0	0	0	0	0	0	0	0	0	0	0	0	0	0	0	0
	Emissions sum at each year (PgC)	0.000239158	0.000639071	0.00326054	0.00537189	0.00702699	0.00790558	0.00997803	0.0133125	0.0162655	0.0189738	0.0238403	0.0259338	0.0259213	0.0254812	0.0268633	0.0269211	0.0273725	0.0267387	0.0270503	0.0271202	0.0257285	0.0260321	0.0272249	0.0271489	0.0273902	0.0287052	0.0300102	0.0299588	0.0322725	0.0337412	0.0345173	0.0347775	0.0341197	0.0358453	0.0357718	0.0368057	0.0361182	0.0377986	0.038048	0.0383799	0.036071	0.0357198	0.0374301	0.0364895	0.0350487	0.0355946	0.0376707	0.0370044
[truncated: 47 more columns]

## Sheet: Table5
Calculating emissions from 100 years life time wood product pool for 2005-2100
Date	100-year pool (PgC)	100-year pool accumulative (PgC)	1% of 100-year pool accumulative (PgC)	Total Emissions from 100-year life time pool (PgC)
2006	6.90066e-05	6.90066e-05	6.90066e-07	6.90066e-07
2007	0.00011539	0.000184397	1.84397e-06	1.84397e-06
2008	0.000756396	0.000940793	9.40793e-06	9.40793e-06
2009	0.000609209	0.00155	1.55e-05	1.55e-05
2010	0.000477562	0.00202756	2.02756e-05	2.02756e-05
2011	0.000253508	0.00228107	2.28107e-05	2.28107e-05
2012	0.000597983	0.00287906	2.87906e-05	2.87906e-05
2013	0.000962117	0.00384117	3.84117e-05	3.84117e-05
2014	0.000852065	0.00469324	4.69324e-05	4.69324e-05
2015	0.00078145	0.00547469	5.47469e-05	5.47469e-05
2016	0.0014732	0.00694788	6.94788e-05	6.94788e-05
2017	0.000719435	0.00766732	7.66732e-05	7.66732e-05
2018	0.000752791	0.00842011	8.42011e-05	8.42011e-05
2019	0.000482215	0.00890232	8.90232e-05	8.90232e-05
2020	0.000876362	0.00977869	9.77869e-05	9.77869e-05
2021	0.000270175	0.0100489	0.000100489	0.000100489
2022	0.00072823	0.0107771	0.000107771	0.000107771
2023	0.000779236	0.0115563	0.000115563	0.000115563
2024	0.000941978	0.0124983	0.000124983	0.000124983
2025	0.00080162	0.0132999	0.000132999	0.000132999
2026	0.00107163	0.0143716	0.000143716	0.000143716
2027	0.000807037	0.0151786	0.000151786	0.000151786
2028	0.00109697	0.0162756	0.000162756	0.000162756
2029	0.000460293	0.0167359	0.000167359	0.000167359
2030	0.000945979	0.0176818	0.000176818	0.000176818
2031	0.00064961	0.0183315	0.000183315	0.000183315
2032	0.00110475	0.0194362	0.000194362	0.000194362
2033	0.000764404	0.0202006	0.000202006	0.000202006
2034	0.00160959	0.0218102	0.000218102	0.000218102
2035	0.0012254	0.0230356	0.000230356	0.000230356
2036	0.00129556	0.0243312	0.000243312	0.000243312
2037	0.000882122	0.0252133	0.000252133	0.000252133
2038	0.000907168	0.0261205	0.000261205	0.000261205
2039	0.000958186	0.0270786	0.000270786	0.000270786
2040	0.000924789	0.0280034	0.000280034	0.000280034
2041	0.00094792	0.0289513	0.000289513	0.000289513
2042	0.000906391	0.0298577	0.000298577	0.000298577
2043	0.00124925	0.031107	0.00031107	0.00031107
2044	0.00168157	0.0327886	0.000327886	0.000327886
2045	0.00132117	0.0341097	0.000341097	0.000341097
2046	0.000629341	0.0347391	0.000347391	0.000347391
2047	0.000780805	0.0355199	0.000355199	0.000355199
2048	0.00140063	0.0369205	0.000369205	0.000369205
2049	0.000686786	0.0376073	0.000376073	0.000376073
2050	0.000509067	0.0381164	0.000381164	0.000381164
2051	0.00110544	0.0392218	0.000392218	0.000392218
2052	0.00150544	0.0407272	0.000407272	0.000407272
2053	0.00105698	0.0417842	0.000417842	0.000417842
2054	0.00231348	0.0440977	0.000440977	0.000440977
2055	0.00233356	0.0464313	0.000464313	0.000464313
2056	0.00169831	0.0481296	0.000481296	0.000481296
2057	0.00155051	0.0496801	0.000496801	0.000496801
2058	0.000744741	0.0504248	0.000504248	0.000504248
2059	0.00104492	0.0514697	0.000514697	0.000514697
2060	0.00115903	0.0526288	0.000526288	0.000526288
2061	0.00136823	0.053997	0.00053997	0.00053997
2062	0.00147278	0.0554698	0.000554698	0.000554698
2063	0.00144658	0.0569164	0.000569164	0.000569164
2064	0.00179151	0.0587079	0.000587079	0.000587079
2065	0.00175914	0.060467	0.00060467	0.00060467
2066	0.00176281	0.0622298	0.000622298	0.000622298
2067	0.00166787	0.0638977	0.000638977	0.000638977
2068	0.000844358	0.064742	0.00064742	0.00064742
2069	0.000896705	0.0656388	0.000656388	0.000656388
2070	0.00135022	0.066989	0.00066989	0.00066989
2071	0.0016028	0.0685918	0.000685918	0.000685918
2072	0.0017724	0.0703642	0.000703642	0.000703642
2073	0.00305293	0.0734171	0.000734171	0.000734171
2074	0.00194065	0.0753578	0.000753578	0.000753578
2075	0.00153947	0.0768972	0.000768972	0.000768972
2076	0.00177433	0.0786715	0.000786715	0.000786715
2077	0.00213205	0.0808036	0.000808036	0.000808036
2078	0.00333043	0.084134	0.00084134	0.00084134
2079	0.0014033	0.0855373	0.000855373	0.000855373
2080	0.00199139	0.0875287	0.000875287	0.000875287
2081	0.00152471	0.0890534	0.000890534	0.000890534
2082	0.00182035	0.0908738	0.000908738	0.000908738
2083	0.00233229	0.0932061	0.000932061	0.000932061
2084	0.00198457	0.0951906	0.000951906	0.000951906
2085	0.00231629	0.0975069	0.000975069	0.000975069
2086	0.00185	0.0993569	0.000993569	0.000993569
2087	0.00124467	0.100602	0.00100602	0.00100602
2088	0.0021935	0.102795	0.00102795	0.00102795
2089	0.00216061	0.104956	0.00104956	0.00104956
2090	0.00284158	0.107797	0.00107797	0.00107797
2091	0.0019601	0.109757	0.00109757	0.00109757
2092	0.00170315	0.111461	0.00111461	0.00111461
2093	0.00103216	0.112493	0.00112493	0.00112493
2094	0.00239797	0.114891	0.00114891	0.00114891
2095	0.00146049	0.116351	0.00116351	0.00116351
2096	0.00229859	0.11865	0.0011865	0.0011865
2097	0.00175444	0.120404	0.00120404	0.00120404
2098	0.00204553	0.12245	0.0012245	0.0012245
2099	0.00242209	0.124872	0.00124872	0.00124872
2100	0.00150482	0.126377	0.00126377	0.00126377

## Sheet: Table6
Calculating sum of emissions from 1, 10, and 100 years life time wood product pools at eaqch year and from 2005-2100
Date	Total Emissions from 1-year life time pool (PgC)	Total Emissions from 10-year life time pool (PgC)	Total Emissions from 100-year life time pool (PgC)	Total Emissions at each year (PgC)
2006	1.89667e-05	0.000239158	6.90066e-07	0.000258815
2007	3.17155e-05	0.000639071	1.84397e-06	0.00067263
2008	0.000207898	0.00326054	9.40793e-06	0.00347784
2009	0.000167443	0.00537189	1.55e-05	0.00555483
2010	0.00013126	0.00702699	2.02756e-05	0.00717853
2011	6.96776e-05	0.00790558	2.28107e-05	0.00799807
2012	0.000164358	0.00997803	2.87906e-05	0.0101712
2013	0.000264441	0.0133125	3.84117e-05	0.0136153
2014	0.000234193	0.0162655	4.69324e-05	0.0165466
2015	0.000214785	0.0189738	5.47469e-05	0.0192433
2016	0.000404914	0.0238403	6.94788e-05	0.0243147
2017	0.000197739	0.0259338	7.66732e-05	0.0262082
2018	0.000206907	0.0259213	8.42011e-05	0.0262124
2019	0.000132538	0.0254812	8.90232e-05	0.0257027
2020	0.000240872	0.0268633	9.77869e-05	0.027202
2021	7.42587e-05	0.0269211	0.000100489	0.0270958
2022	0.000200157	0.0273725	0.000107771	0.0276804
2023	0.000214176	0.0267387	0.000115563	0.0270684
2024	0.000258906	0.0270503	0.000124983	0.0274342
2025	0.000220328	0.0271202	0.000132999	0.0274735
2026	0.000294543	0.0257285	0.000143716	0.0261667
2027	0.000221817	0.0260321	0.000151786	0.0264057
2028	0.000301507	0.0272249	0.000162756	0.0276892
2029	0.000126513	0.0271489	0.000167359	0.0274428
2030	0.000260006	0.0273902	0.000176818	0.027827
2031	0.000178548	0.0287052	0.000183315	0.0290671
2032	0.000303646	0.0300102	0.000194362	0.0305082
2033	0.000210099	0.0299588	0.000202006	0.0303709
2034	0.000442403	0.0322725	0.000218102	0.032933
2035	0.000336805	0.0337412	0.000230356	0.0343084
2036	0.000356089	0.0345173	0.000243312	0.0351167
2037	0.000242454	0.0347775	0.000252133	0.0352721
2038	0.000249339	0.0341197	0.000261205	0.0346302
2039	0.000263361	0.0358453	0.000270786	0.0363794
2040	0.000254182	0.0357718	0.000280034	0.036306
2041	0.000260539	0.0368057	0.000289513	0.0373557
2042	0.000249125	0.0361182	0.000298577	0.0366659
2043	0.00034336	0.0377986	0.00031107	0.038453
2044	0.000462186	0.038048	0.000327886	0.0388381
2045	0.000363128	0.0383799	0.000341097	0.0390841
2046	0.000172977	0.036071	0.000347391	0.0365913
2047	0.000214607	0.0357198	0.000355199	0.0362896
2048	0.000384969	0.0374301	0.000369205	0.0381842
2049	0.000188766	0.0364895	0.000376073	0.0370543
2050	0.000139919	0.0350487	0.000381164	0.0355698
2051	0.000303834	0.0355946	0.000392218	0.0362906
2052	0.000413776	0.0376707	0.000407272	0.0384918
2053	0.000290516	0.0370044	0.000417842	0.0377128
2054	0.000635869	0.0391944	0.000440977	0.0402713
2055	0.000641389	0.0427031	0.000464313	0.0438088
2056	0.000466788	0.0464079	0.000481296	0.047356
2057	0.000426162	0.0490755	0.000496801	0.0499984
2058	0.000204695	0.0468023	0.000504248	0.0475113
2059	0.0002872	0.0480435	0.000514697	0.0488454
2060	0.000318564	0.0502961	0.000526288	0.051141
2061	0.000376063	0.0512069	0.00053997	0.0521229
2062	0.0004048	0.0510937	0.000554698	0.0520532
2063	0.000397599	0.052444	0.000569164	0.0534107
2064	0.000492403	0.050635	0.000587079	0.0517144
2065	0.000483506	0.0486441	0.00060467	0.0497323
2066	0.000484514	0.0488677	0.000622298	0.0499745
2067	0.000458421	0.0492744	0.000638977	0.0503718
2068	0.000232075	0.0496197	0.00064742	0.0504992
2069	0.000246463	0.049106	0.000656388	0.0500088
2070	0.000371113	0.0497686	0.00066989	0.0508096
2071	0.000440536	0.0505816	0.000685918	0.051708
2072	0.000487151	0.05162	0.000703642	0.0528108
2073	0.000839109	0.0571871	0.000734171	0.0587604
2074	0.000533394	0.057704	0.000753578	0.058991
2075	0.00042313	0.0569427	0.000768972	0.0581348
2076	0.00048768	0.0569826	0.000786715	0.058257
2077	0.000586003	0.0585913	0.000808036	0.0599854
2078	0.000915381	0.0672074	0.00084134	0.0689641
2079	0.000385701	0.0689631	0.000855373	0.0702042
2080	0.000547342	0.0711852	0.000875287	0.0726079
2081	0.000419072	0.0709146	0.000890534	0.0722242
2082	0.00050033	0.0710808	0.000908738	0.0724898
2083	0.000641038	0.0685832	0.000932061	0.0701563
2084	0.000545468	0.0687355	0.000951906	0.0702328
2085	0.000636641	0.0714277	0.000975069	0.0730394
2086	0.00050848	0.07169	0.000993569	0.073192
2087	0.000342101	0.0686145	0.00100602	0.0699626
2088	0.000602892	0.0646742	0.00102795	0.0663051
2089	0.000593851	0.0672989	0.00104956	0.0689423
2090	0.000781019	0.0702454	0.00107797	0.0721044
2091	0.000538742	0.0717544	0.00109757	0.0733907
2092	0.000468118	0.0713482	0.00111461	0.0729309
2093	0.000283693	0.0668423	0.00112493	0.0682509
2094	0.000659092	0.068275	0.00114891	0.070083
2095	0.00040142	0.065309	0.00116351	0.0668739
2096	0.000631777	0.0668637	0.0011865	0.068682
2097	0.000482213	0.0686304	0.00120404	0.0703167
2098	0.000562223	0.0681176	0.0012245	0.0699043
2099	0.000665722	0.0690239	0.00124872	0.0709383
2100	0.000413604	0.064391	0.00126377	0.0660684
